# Supplementary material
Source: PubMed Central journal article supplement (PMC9846390)
Supplement: sj-pdf-1-dst-10.1177_19322968211033837.pdf [file sj-pdf-1-dst-10.1177_19322968211033837.pdf]

## Supplemental Materials

Insulclock®: smart insulin pen cap and Insulclock App/System.

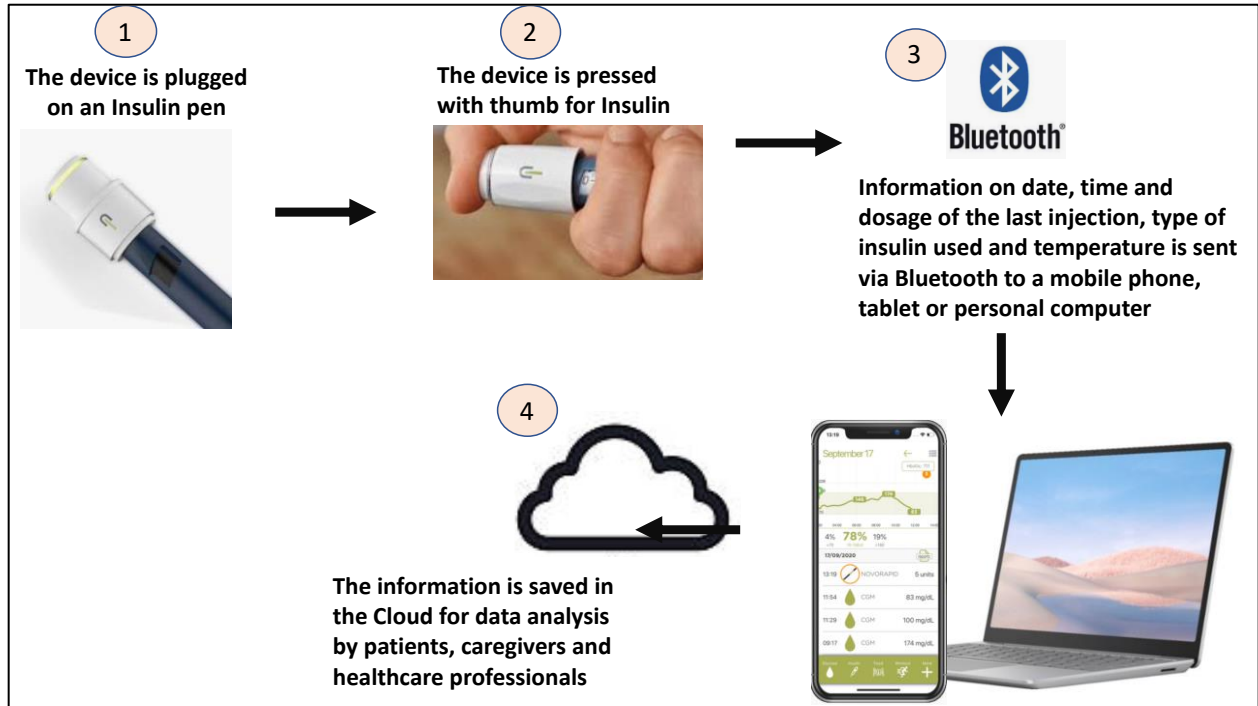

Source: <https://insulclock.com/en/professional/>
